# Supplementary material
Source: PubMed Central journal article supplement (PMC2680509)
Supplement: NIHMS4865-supplement-Fig_s1.pdf [file NIHMS4865-supplement-Fig_s1.pdf]

Fig. S1

A

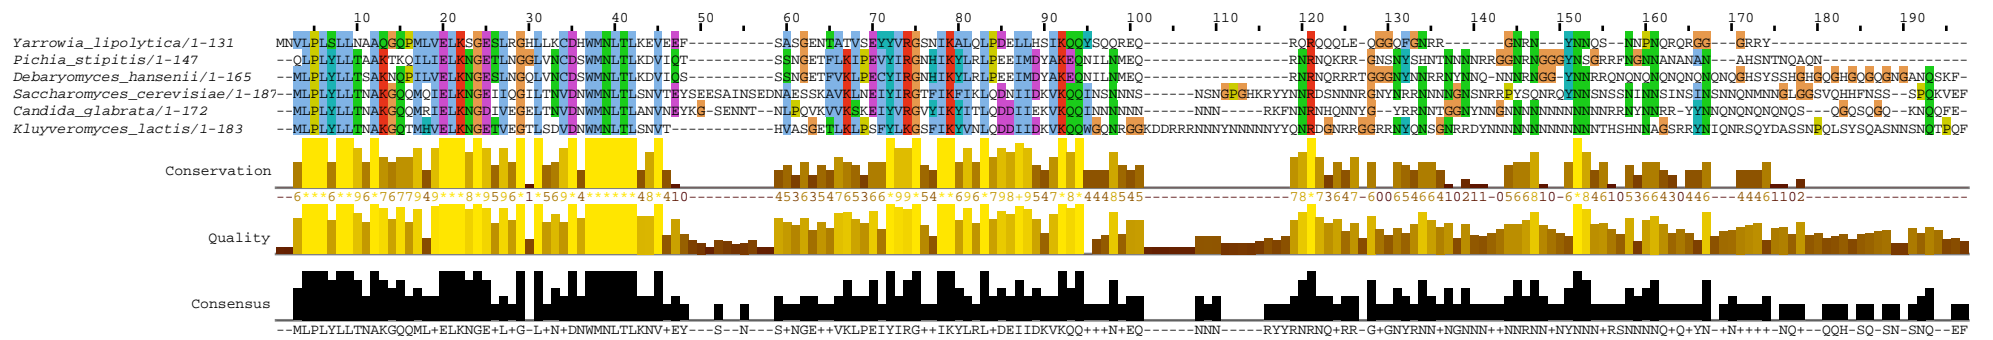

B

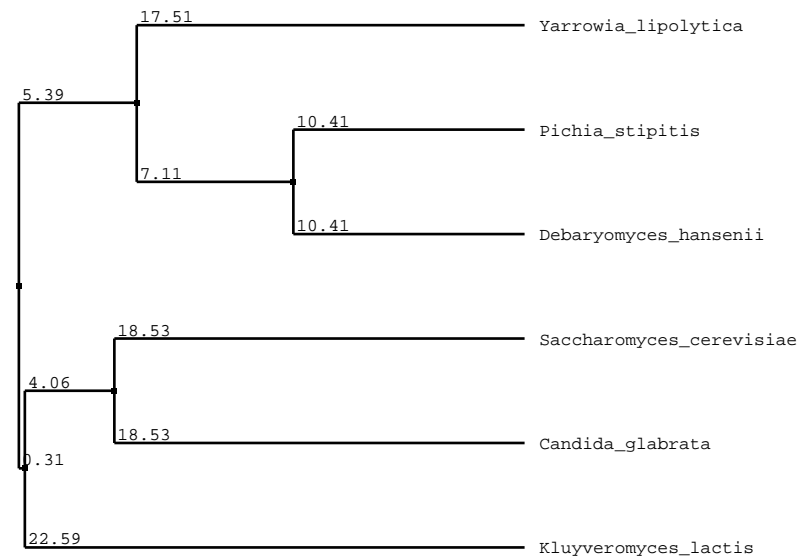

**Fig. S1** The C-termini of budding yeast Lsm4 proteins contain high levels of N and/or Q residues.

**(A)** Alignment of Lsm4 proteins from budding yeasts

**(B)** Phylogenetic tree of budding yeast Lsm4 proteins
