# Supplementary material
Source: PubMed Central journal article supplement (PMC2680509)
Supplement: NIHMS4865-supplement-Fig_s5.pdf [file NIHMS4865-supplement-Fig_s5.pdf]

**Fig. S5**

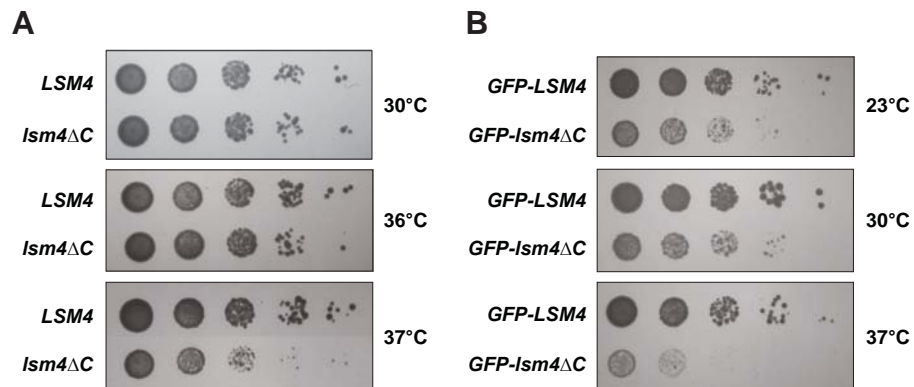

**Fig. S5** An N-terminal GFP tag aggravates the slow growth phenotype of the Lsm4p C-terminal deletion strain. **(A)** MRY71 (*LSM4*) and MRY73 (*Ism4ΔC*) strains were grown overnight in YPDA at 30°C, plated in ten-fold serial dilutions on YPDA and grown at 30°C, 36°C and 37°C. **(B)**  $P_{GAL}$ -*LSM4* strain (MCY4) with GFP-tagged Lsm4p (pMPSLsm4) or Lsm4ΔCp (pMPS Lsm4D1) was grown overnight in SD-Ura-Met at 30°C, plated in ten-fold serial dilutions on SD-Ura-Met and grown at 23°C, 30°C and 37°C.
